# Supplementary material for: A network pharmacology analysis on drug-like compounds from Ganoderma lucidum for alleviation of Atherosclerosis
Source: Research Square preprint supplement (doi:10.21203/rs.3.rs-236410/v1), 2021-02-26
Supplement: Supplementary file 1 [file 536f9c0dcf8521fd59916c23.pdf]

## Supplementary Table S2

---

A total of 2,606 genes related to Atherosclerosis

---

LDLR  
AGER  
AGT  
SIRT1  
HP  
PPARG  
CYP27A1  
CETP  
CRP  
CYBA  
ABCA1  
ESR1  
ALOX5  
ALOX15  
APOA4  
ICAM1  
IFNG  
APOE  
IL6  
LPA  
MMP1  
NOS3  
SERPINE1  
PLA2G2A  
PON1  
PTGS2  
CCL2  
STAT3  
TLR4  
TNF  
VCAM1  
VEGFA  
CAV1  
ADIPOQ  
GSTM1  
ALOX5AP  
CNR2  
PLAT  
SOCS3  
AHR  
ABCG5

SOD1  
PARP1  
NOS2  
NR1H4  
IGF2  
LTA4H  
CCL4  
SOD2  
TRIM28  
HRH1  
HSPA1B  
FASLG  
NECTIN2  
BCL3  
CELA2A  
CCL3  
TRPV1  
HMGB1  
IL18  
MMP2  
NPC1  
SELP  
TTPA  
CD36  
CD40  
CD40LG  
CLU  
F2  
CASP3  
CASR  
FAS  
LCAT  
LMNA  
LDLRAP1  
ENPP1  
ENG  
FOS  
WRN  
SLC17A4  
CDKN2B-AS1  
ZGLP1  
NR1H3  
CDKN2A

KLF2  
CFDP1  
AGPAT2  
AHSA1  
UTS2  
CHI3L1  
ADAMTS7  
NLRP3  
CCR5  
COL3A1  
CRK  
MAPK14  
CST3  
CX3CR1  
ACE  
DECR1  
DNMT1  
DPP4  
AGTR1  
AGXT  
EDN1  
EGR1  
AHSG  
ELN  
AKT1  
ALB  
F3  
FABP4  
SAMMD4A  
FN1  
SMUG1  
GABPA  
PCSK9  
RNF19A  
POLDIP2  
FGF21  
GCG  
BSCL2  
GGCX  
IL37  
ANGPTL3  
GLP1R  
ANGPT1

CAVIN1  
ANGPT2  
HGD  
HIF1A  
HMOX1  
HSPD1  
APOA1  
APOA2  
APOB  
APOC3  
IGF1  
APOH  
IL1A  
IL1B  
CXCL8  
IL10  
IL17A  
ABCC6  
LEP  
LGALS3  
LPL  
LRP1  
MIR126  
MIR155  
MIR21  
MIR33A  
MBL2  
MEFV  
MMP3  
MMP9  
MMP12  
MPO  
MTHFR  
ATM  
NFE2L2  
NPY  
NOTCH3  
OLR1  
TNFRSF11B  
NOX4  
PAPPA  
FOXP3  
ANGPTL4

HSPA14  
PECAM1  
PIK3CA  
PIK3CB  
PIK3CD  
PIK3CG  
PLA2G1B  
PLG  
PLTP  
PON2  
PPARA  
PPIA  
TET2  
PINX1  
CHDH  
PRKAA1  
PRKAA2  
PRKAB1  
APOM  
MAPK1  
RETN  
PTX3  
CXCL16  
MOK  
ACE2  
REN  
SORT1  
SAA1  
CX3CL1  
CXCL12  
SELE  
SLC5A2  
SPP1  
SREBF2  
TGFB1  
TGFB3  
THBS1  
TLR2  
TM7SF2  
TP53  
TNFSF4  
CCR2  
TXN

UCP2  
VPS51  
VWF  
ALMS1  
CXCR4  
CAD  
PLA2G7  
AIMP2  
EHMT1  
LPAL2  
FGF23  
ANGPTL6  
PLA2G10  
ANTXR1  
BANF1  
NR1H2  
IL33  
XPR1  
CD14  
KLF4  
KL  
LIPG  
GRAP2  
SCARB1  
CD44  
ABCG1  
CXCR6  
MTCO2P12  
APOA5  
CTSS  
EDNRA  
ESR2  
ALDH2  
GJA4  
GPR162  
ANPEP  
TNC  
TNFRSF9  
INSR  
MALAT1  
MIR145  
MIR221  
COX2

MYD88  
SOST  
MAPK3  
HAMP  
SLC2A1  
BSG  
APOL1  
CCN2  
PADI4  
MTOR  
HMGCR  
IL4  
ITGAX  
ACAT1  
LCN2  
CIMT  
LTA  
MIR146A  
MIR223  
IL23A  
PON3  
PPARD  
ACTB  
S100A12  
CCL5  
ADAM17  
USF1  
WNT5A  
YWHAZ  
CASP1  
CD68  
ABCB6  
NAMPT  
ADRA2B  
PLB1  
SGMS2  
FCGR3A  
FGF2  
FOXO1  
AKR1B1  
COPD  
PTPN22  
ACACA

NR4A1  
HSPB1  
HSPB2  
APRT  
KDR  
MIR27A  
MFAP1  
NR3C2  
ACKR3  
BCL2  
RENBP  
ROS1  
SFTPD  
SOAT1  
STAT1  
TCF7L2  
TSPO  
BECN1  
HSPB3  
CD34  
GDF15  
BMS1  
PGR-AS1  
HPSE  
CSF2  
VCAN  
ADRA1A  
F2RL1  
FOXO3  
GPR42  
GSTT1  
HGF  
HSD11B1  
HSPA4  
IFNA1  
IFNA13  
IL2RA  
INS  
ITGB2  
JAK2  
LIPC  
MMP13  
P2RY2



F11R  
PDE4D  
TREM1  
LGMN  
PTH  
RARRES2  
GAS5  
SAA2  
BGLAP  
BGN  
SELPLG  
SSTR4  
BRS3  
TFPI  
TIMP1  
TRAF6  
FTO  
TFEB  
TFPI2  
CAMP  
CAT  
PLPP3  
TNFSF10  
APLN  
SQSTM1  
LPAR2  
CLOCK  
HDAC9  
CDKN2B  
CHIT1  
CCR7  
CTNNB1  
CYBB  
ECE1  
EGFR  
EPRS1  
EZH2  
F2R  
FCGR3B  
MMRN1  
FMO3  
SIRT3  
ALOX15B

GH1  
TOR2A  
GNB3  
ABO  
GPX1  
GRN  
CXCL1  
HSPG2  
C1QTNF9  
IGF1R  
APP  
ISG20  
KNG1  
ARG1  
MIRLET7G  
MIR122  
MIR217  
MIR29A  
MIR34A  
MGP  
MIF  
MMP8  
NOTCH1  
NT5E  
P2RX7  
ADIPOR1  
TNFRSF12A  
PF4  
PGF  
TUG1  
MAPK8  
MYDGF  
PTEN  
S100A8  
SCD  
CCL11  
ABCG8  
SREBF1  
TERT  
THBD  
TNFRSF1A  
VLDLR  
DHX40

PDGFD  
PLA2G6  
AOC3  
CD1D  
SLC33A1  
IL32  
NTN1  
LPCAT3  
KHDRBS1  
CES1  
TNFSF13B  
PPARGC1A  
CHRM3  
PLIN2  
LTB4R  
COMP  
ADM  
CP  
KLF14  
CTH  
IL23R  
CYP2C9  
APLNR  
S1PR1  
AIF1  
ELANE  
ELAVL2  
EPHB2  
EPHX2  
F10  
FCGR2A  
PHACTR1  
DKK1  
FLNA  
FLT1  
FPR2  
NUP62  
IL27  
GAS6  
GCH1  
GHSR  
GJA1  
SGSM3

OR10A4  
GTF2H1  
IL19  
CFH  
HFE  
CCN1  
IL1RN  
IL6ST  
IL9  
AQP1  
IL13  
IDO1  
IRAK1  
LOX  
LRP6  
ARNTL  
MIR17  
MIR19B1  
MIR210  
MIR24-1  
MIR30C1  
MIR30C2  
MAP3K5  
MFGE8  
MMP14  
MSR1  
MTTP  
RNR2  
ACLY  
NFKB1  
NOS1  
P4HB  
FURIN  
DCTN4  
TLR7  
SIRT6  
GHRL  
PDZK1  
SERPINF1  
PKM  
PLAU  
IL17D  
ANGPTL8

PTGIR  
PTGS1  
TRIB3  
RBP4  
RYR3  
S100A9  
NOD2  
SHBG  
IL25  
BMP2  
SLC9A1  
SMPD1  
MIR590  
TCF21  
TIMP3  
TNFRSF4  
UCP1  
VIM  
VTN  
CNBP  
DDR1  
VKORC1  
ADIPOR2  
SOCS1  
IRS2  
TNFSF12  
DNER  
CD163  
MYOCD  
MAP4K4  
ADAMTS4  
ENTPD1  
CD47  
CD59  
LINC01672  
ADAM8  
ADAM10  
CBSL  
TP53COR1  
YAP1  
APOA1-AS  
MERTK  
SLC35A1

CST12P  
OGA  
ADAMTS13  
CAPN10  
NISCH  
ADD1  
CTSD  
CTSK  
GPBAR1  
CXADR  
CYP2B6  
DCN  
HBEGF  
DUSP1  
EGF  
EPHA2  
ELK1  
EVPL  
F5  
FABP5  
ACSL1  
PTK2B  
FBN1  
KIF6  
FGF13  
SCAP  
ANGPTL2  
FSHMD1A  
GC  
GIP  
NOX1  
HPGDS  
GPI  
NEAT1  
SETD2  
GSK3B  
RMC1  
ANXA1  
HABP2  
SERPIND1  
ANXA5  
HLA-C  
AOC2

APCS  
HSPA5  
HSP90AA1  
HCAR2  
APOBEC1  
ID3  
IKBKB  
IL15  
IRF1  
IRF6  
AR  
ITGA2B  
ITGB3  
KIT  
LEPR  
LIPA  
MIR10A  
MIR143  
MIR144  
MIR19A  
MIR20A  
MIR212  
MIR216A  
MIR222  
MIR98  
TNFSF12-TNFSF13  
MAOA  
MAS1  
MAZ  
MRC1  
MIAT  
MT2A  
COX1  
MYC  
MYLK  
NPPB  
NPPC  
MIR377  
PRDX1  
PIN1  
DYM  
CASZ1  
SLC52A1

MEG3  
BATF3  
MAP2K1  
PROS1  
B2M  
PNPLA2  
PTGDS  
MIR497  
NCEH1  
SEMA6A  
JCAD  
PTPN1  
TRPV4  
ROCK1  
S100B  
CCL22  
SFRP5  
BMP4  
SORL1  
STAT4  
SYK  
TAGLN  
KLF5  
BTF3P11  
MIR33B  
TIE1  
TLR5  
CRISP2  
VDR  
XBP1  
XDH  
CA2  
LRP8  
SLC25A20  
NR4A3  
SP6  
IL1F10  
PSRC1  
SEMA7A  
TNFSF11  
STC2  
MBTPS1  
CBS



ADAM15  
CREG1  
ESAM  
CD5L  
GAL3ST1  
NOS1AP  
PCLAF  
TNFSF15  
ADA  
HOTAIR  
HDAC5  
PDCD6IP  
HLP  
CDH5  
TMED7-TICAM2  
SNHG16  
KLRC4-KLRK1  
LINC-ROR  
ABI2  
TRIM13  
PRG4  
GDF11  
CDKN1A  
ZMPSTE24  
CDKN1B  
NOD1  
CEL  
TXNIP  
POSTN  
LARP1BP2  
RNU6-392P  
RN7SL263P  
NFAT5  
CTSC  
LOC107985770  
NOXA1  
COPS5  
RIPK3  
CHGA  
CHRNA4  
C1QTNF6  
CISH  
H3P31

TNFRSF13C

CLIC1

CCR3

CMKLR1

EARS2

OSCAR

CNN2

CNP

CNR1

OSCP1

COL4A1

NAXE

COL15A1

COMT

ADK

SLCO6A1

COX8A

CPB2

CR1

ACTRT1

CSF1

CTF1

CTSL

CCDC80

DAB2IP

ADRB2

CYP1A1

CYP1A2

CYP2J2

CYP7A1

CYP19A1

DAB2

DBP

ACAN

DNAH8

DNASE1

JAG1

ATN1

DSC1

DSPP

AGTR2

EDA

LPAR1

PRSS55  
EPHA1  
EPO  
ERG  
AKT2  
F7  
F13A1  
FABP2  
FBN2  
FCGR2B  
FGB  
FGF1  
FGFR1  
FGG  
ZHX2  
KLRK1  
PALLD  
KDM6B  
MPRIIP  
PMPCA  
ARL6IP1  
FOLR2  
PLA2G15  
ABCA4  
GAST  
POU2F3  
ABCA12  
HSPB8  
SLC17A5  
GREM1  
MSTN  
GHRHR  
GJA5  
FOXP1  
DKK3  
PALD1  
INTU  
NAAA  
GLO1  
GOT2  
GPER1  
RGCC  
NR3C1

CXCL2  
GUCY1A1  
NPC1L1  
PADI1  
GZMB  
HDAC1  
NRG1  
HMGA1  
HNF4A  
APC  
BIRC3  
HSPA1A  
GPIHBP1  
FFAR4  
IRF8  
NANOS3  
IRGM  
IGFBP1  
IGFBP3  
IGFBP7  
TICAM2  
IL5  
IL6R  
CXCR2  
IRF2BP2  
CXCL10  
INPP5D  
IRF5  
IRS1  
ITGAV  
GSK1  
NEXN-AS1  
MIA3  
RHOA  
CCL4L1  
C1QL3  
RPSA  
LGALS3BP  
LIF  
LPP  
LRP2  
MIRLET7B  
MIR10B

MIR134  
MIR142  
MIR150  
MIR152  
MIR181A2  
MIR206  
ARR3  
MIR23B  
MIR25  
MIR29B1  
MIR29B2  
MIR30E  
MIR99A  
MAA  
SMAD3  
SMAD7  
DEFB103A  
MC1R  
MCAM  
FOXO4  
MMP7  
PLIN5  
MIR133B  
MIR135B  
MIR148B  
MSRA  
MYH11  
NEU1  
CCN3  
NPPA  
NPR3  
MIR375  
OGG1  
OGN  
OSM  
PCSK6  
PAEP  
IL20  
MBL3P  
TMED7  
IRAK4  
ZC3HC1  
PDGFB

PLA2G4A  
PLAUR  
PLIN1  
PLXNA2  
TLR9  
SOX18  
PPBP  
SAMD9  
ACP3  
PRKAR1A  
SELENOS  
DEFB103B  
ACSS2  
MAPK7  
PROC  
PRTN3  
PLAAT1  
PTAFR  
AS3MT  
MIR146B  
MIR499A  
AHRR  
RNF213  
NGB  
RAG1  
RARA  
RCN2  
RELA  
NIF3L1  
RORA  
BCR  
RPS19  
RXRA  
S100A1  
CCL18  
CCL19  
CCL21  
CLEC7A  
GORASP1  
PDIA2  
ST3GAL4  
WNK1  
UCA1

CXADRP1  
NCF1  
BMP7  
SNAI2  
SIGLEC1  
SPG7  
SRI  
BRCA1  
ST2  
STAT6  
STK11  
SYT1  
HNF1A  
TFAP2A  
NR2F2  
TGM2  
THBS4  
C1QBP  
TLR3  
TNFRSF1B  
C3  
TRPC3  
MIR652  
TTR  
TUFM  
VCL  
XIST  
ZFP36  
CACNA1C  
ELOVL6  
NOX5  
ADAM33  
COL18A1  
TAM  
CAPN1  
CAST  
SESN2  
LOH19CR1  
ARID5B  
CASP9  
SOAT2  
HHIPL1  
KISS1R

SPZ1  
ACCS  
ADTRP  
HAVCR2  
RGS5  
GFM1  
TSLP  
PDE5A  
TNFSF14  
TNFSF9  
RIPK2  
HDAC3  
LDB2  
TBX18  
NEXN  
AIMP1  
CD28  
ORMDL3  
AIM2  
IL27RA  
ROCK2  
ADAMTS3  
CCL4L2  
NCOR1  
CD69  
PIEZO1  
MAGI2  
WDR1  
NR1I3  
NAT2  
AKT3  
TLX1NB  
MIR876  
C20orf181  
HDAC6  
HOXA-AS3  
SH2B3  
CASC11  
DEFB4B  
MIR664A  
AAA1  
PARP3  
MIR3188



OCLN  
MICA  
MICOS10-NBL1  
P2RX5-TAX1BP3  
DNM1L  
MIR4463  
IL18BP  
HIF1A-AS1  
CDH13  
ZNF263  
EBI3  
ATP6AP2  
CDK2  
SORBS3  
PRMT3  
PSME3  
CDK5  
MPZL2  
KLRG1  
RABEPK  
CDK9  
SPRY1  
FSTL3  
GATD3B  
LOC102724197  
STUB1  
CDKN1C  
TCIRG1  
LANCL1  
TLR6  
CDR1-AS  
MICU1  
DLC1  
PEMT  
SPON2  
LYPLA1  
C1D  
MIR222HG  
VAV3  
FST  
CAP1  
CREB3  
STK25

CEBPA  
SEMA4D  
CEBPB  
KAT5  
ATG7  
ZNRD2  
PROCR  
PRDX4  
HTATIP2  
CXCL13  
TXNRD2  
PDLIM5  
HEXIM1  
CAMKK2  
SIRT1-AS  
CTCF  
DCTN6  
TRAF3IP2  
NES  
MTHFD2  
CYSLTR1  
CCR9  
FRS2  
LILRB1  
USP20  
GSC-DT  
MALT1  
BRD8  
MASCRNA  
EBNA1BP2  
LILRB4  
ABHD2  
KERA  
ESM1  
ADAMTS5  
CIT  
WDHD1  
SLC2A6  
EGLN3  
SNF8  
IL17F  
LINC02605  
LYST

COPE  
ACOT7  
MGLL  
CHRNA5  
ADCY8  
LNCRNA-ATB  
CYGB  
OSBPL1A  
OSBPL8  
C1QTNF1  
C1QTNF5  
ADCY9  
H3P23  
H3P28  
H3P10  
ADCYAP1  
TADA1  
CLCN2  
PRAP1  
SERPINA3  
CMA1  
H4-16  
TDRD9  
CCR6  
CCR8  
SLC5A10  
TNFAIP8L1  
PODN  
COL1A2  
ADH5  
TMEM18  
KCNH8  
CORT  
CLDN7  
CPOX  
CPT2  
CREB1  
ATF2  
MAGEC3  
MAGEE2  
GPR119  
CRMP1  
ZBTB46

CRY1  
TRPM6  
SIRPA  
CRYGD  
CSF1R  
CSF2RB  
CSF3  
SERPINA12  
PWAR1  
NRG4  
IL34  
NKX2-5  
CTBS  
PDIK1L  
BPIFB4  
CTNND1  
CTPS1  
CTSB  
CTSG  
BTLA  
CYLD  
AMOT  
ADRB3  
CYP2C19  
CYP2C8  
CYP2D6  
CYP2E1  
CYP3A4  
LINC00599  
CYP3A5  
CYP26A1  
CYP27B1  
AP2A1  
DAG1  
BRINP1  
MARCHF10  
DBN1  
PAQR7  
GADD45A  
DDIT3  
DEFB4A  
ADAMTS18  
DHCR7

DHCR24  
NQO1  
DIO2  
DLD  
DMD  
DMRT1  
DNMT3B  
AGRP  
RCAN1  
DUSP5  
EBF1  
TYMP  
NR0B1  
EDN3  
AHCY  
EDNRB  
EEF1B2P2  
EFNB1  
PAOX  
MLKL  
ELAVL1  
A2M  
TET3  
MARK2  
EMP1  
EPAS1  
EREG  
ERN1  
ETS1  
ALCAM  
ABCD1  
F11  
F12  
FABP3  
FAP  
FAT1  
UNC5B  
HYLS1  
FBLN2  
MPEG1  
ZEB1-AS1  
LINC00305  
FDPS

FGA  
FGF12  
FGFR4  
FHL2  
VEGFD  
CARD8  
SIRT2  
P2RX2  
MYH15  
FOXM1  
STAB1  
MLC1  
NBEAL2  
FLT4  
PACS2  
MCF2L  
FMOD  
SASH1  
KCNH4  
TRAM1  
CES3  
SRRM2  
CLCF1  
NNT  
MMD  
PIK3R5  
SLC16A8  
FOSB  
ATP6V0A2  
DDAH2  
DDAH1  
CARHSP1  
PATZ1  
CLEC5A  
DAPK2  
BACE1  
EID1  
ALOX12  
PANX1  
ZNF318  
ALPL  
NR5A2  
FTH1

FUT3  
FUT7  
FNDC5  
FUT8  
ACKR1  
FYN  
UTS2B  
GCA  
LMOD1  
BAMBI  
PART1  
POT1  
SGMS1  
CLIC4  
WWTR1  
PNKD  
ADGRA2  
CHMP2B  
TMEM98  
APPL1  
ARHGEF26  
TES  
LRRC32  
GATA2  
CLEC4E  
GATA4  
FBXO8  
FBXO3  
PLA2G2D  
GCGR  
GCK  
GCKR  
NR6A1  
PCOLCE2  
GDF2  
GFER  
HAVCR1  
AMH  
RNU1-1  
HBP1  
FETUB  
SLC39A1  
SIGLEC9

IL17B  
PDCD4  
GCLM  
RBMS3  
BHLHE22  
GLI2  
GLRX  
GOLGB1  
GP1BA  
H19  
CXCR3  
CLEC9A  
HCCAT5  
LPAR4  
SCARA5  
GPR39  
FFAR1  
GPX4  
IGLV2-18  
IGKV2D-29  
KLF15  
ABR  
PYCARD  
BRD7  
CD274  
GSR  
GSTM2  
GTF3A  
GTS  
ICOS  
HILPDA  
OSGIN1  
GYPC  
PSAT1  
SLC40A1  
ANXA2  
HAL  
HAS2  
HAS3  
HCRT  
HDC  
HDLBP  
HLA-A



HLA-B  
FOXA3  
HNRNPU  
HOXA1  
HOXB9  
HPX  
HRH2  
APEX1  
HES1  
HSF1  
HSPA2  
XIAP  
S100A7A  
CLEC4D  
MMS  
ENPP7  
NANOS2  
BRINP3  
ARMH1  
ID1  
LINC00299  
ARSI  
ACER2  
APOC1  
IDH2  
GOLGA6A  
IFI27  
FCRL6  
APOC2  
IGF2R  
IGFBP5  
IGHE  
IGHG3  
KLK3  
IGSF1  
IL2  
IL7  
IL11  
ILK  
IRF2  
IRF3  
ITGA2  
ITGA5

ITGAD  
ITGAE  
ITGAL  
ITGAM  
ITGB4  
ITGB5  
ITIH4  
ITPR1  
ITPR2  
ITPR3  
IVD  
JUN  
JUNB  
JUND  
JUP  
ENHO  
KCNJ11  
KCNMB1  
KISS1  
KLK1  
KPNA3  
KPNA4  
TBPL2  
C1QTNF12  
LAD1  
LAG3  
LAIR1  
LBP  
LBR  
LDHA  
LECT2  
LIPE  
FADS1  
SNX19  
LMNB1  
HACD4  
LRP5  
LSAMP  
LINC01194  
LTB  
LUM  
CD180  
MIR100

LYZ  
MIR107  
MIR125A  
MIR127  
MIR136  
MIR140  
MIR148A  
MIR149  
MIR15A  
MIR18A  
MIR182  
MIR183  
MIR185  
MIR188  
MIR192  
MIR199A1  
MIR199A2  
MIR205  
MIR214  
MIR22  
MIR224  
MIR23A  
MIR27B  
MIR28  
MIR296  
MIR29C  
MIR302A  
MIR17HG  
SMAD1  
ARSB  
STS  
ARSL  
MC4R  
MCL1  
MCM3  
CD46  
SMCP  
MDK  
MDM2  
MECP2  
MEF2A  
MEF2C  
CD99

CXCL9  
MAP3K10  
KMT2A  
MMP10  
MMP11  
MMP17  
MNDA  
ABCC1  
MIR328  
MIR330  
MIR335  
MIR338  
MIR342  
MIR370  
ASS1  
MST1  
MST1R  
MT1F  
MTAP  
CYTB  
RNR1  
MTRR  
TRNL1  
TRNL2  
MUC1  
MYH9  
NAGLU  
ATF4  
NBL1  
NBN  
NCF2  
NDUFA2  
NDUFAB1  
ATIC  
NEDD4  
ATOH1  
ATOX1  
NF1  
NFIA  
NFE2  
NFKB2  
NFKBIA  
NGFR

NINJ2  
NME2  
NNMT  
NOP2  
NOTCH2  
PNP  
SLC11A2  
NRF1  
ATP2B1  
YBX1  
ROR2  
DDR2  
MIR378A  
OPRK1  
SLC22A18  
OSBP  
P2RX1  
P2RX3  
P2RX4  
P2RX5  
P2RY1  
PEBP1  
PLA2G3  
PAH  
PAK1  
IL22  
CNTN3  
TRAT1  
PC  
PCDH8  
MLXIPL  
PCNA  
INSIG2  
EGFL7  
PLEKHO1  
PCOLCE  
PCOS1  
GP6  
PCP4  
PCSK1  
MZB1  
PCSK5  
TLR8

PDE1A  
PDE4A  
PDE9A  
PDGFA  
SIRT7  
UFM1  
PDGFRB  
NBAS  
PDK1  
PDK4  
SLC26A4  
INPP5K  
ACP1  
PGC  
SERPINA1  
SERPINB9  
PIP  
PITX2  
PITX3  
PLAG1  
TM6SF2  
SERPINF2  
PTOV1  
ATP7A  
P2RY13  
PRRX1  
ACP5  
NANS  
PODXL  
POMC  
TOLLIP  
KRT20  
SMOX  
POU2F1  
CCHCR1  
DLL4  
MED1  
PGPEP1  
DPP8  
CDKAL1  
TESC  
PPP1R1A  
MOCOS

ATG16L1  
PPP2R2A  
RCBTB1  
PTPA  
MIR449A  
H4C15  
CSGALNACT2  
PREP  
SMPD3  
SOX6  
NSUN5  
PRKCA  
PRKCB  
LRP2BP  
ADCY10  
CISD1  
KMT2E  
ZC4H2  
APOBR  
MAPK9  
PDGFC  
MAP2K7  
PRL  
PRNP  
PROX1  
AZGP1  
TRPV5  
LTB4R2  
RELN  
AZU1  
CYP26B1  
SLC2A9  
SUCNR1  
SLC2A4RG  
SPHK2  
PSMA6  
LGALS14  
ANKS1B  
PNO1  
PSMB8  
FAM20C  
AKR1B10  
PSMC5

TBX20  
CD248  
PSMD7  
PSMD9  
PTBP1  
PTGER3  
JPH3  
PTGER4  
PTGIS  
MIR362  
MIR18B  
MIR431  
HNP1  
PTHLH  
MIR451A  
MIR410  
MIR489  
MIR490  
MIR492  
MIR494  
MIR519D  
MIR505  
STRIP2  
MRTFA  
PTN  
CIP2A  
PTPN2  
PTPN6  
MARK4  
CCAR2  
PTPN11  
SLAMF7  
PTPRF  
BAX  
PVR  
NECTIN1  
RAC1  
RAC2  
RAG2  
ACTA2  
IL21  
RARB  
RASA1



RASGRF1  
SIGIRR  
SENP2  
CCND1  
REG1A  
RFC1  
RFC2  
RFX1  
RFX5  
RGS1  
RGS2  
RGS3  
RGS7  
RHEBP1  
RLN2  
RNASE1  
RNASE3  
CPAT1  
RPS6KA1  
FIQTL1  
MIR486-1  
MIR455  
BDKRB2  
BDNF  
S100A7  
SAA3P  
TSPAN31  
SAT1  
SCN7A  
CEACAM1  
SCP2  
CCL1  
CCL7  
CCL8  
CCL17  
CCL20  
CCL23  
CCL25  
BIK  
SDC1  
SDC4  
PRDM1  
CIDEA

SELL  
SAMSN1  
BLM  
SLC39A8  
LEF1-AS1  
CARD9  
ECSCR  
ROBO3  
SFRP4  
SRSF1  
SRSF2  
ARHGEF28  
FBRS  
SGCB  
SHC1  
NORAD  
ST6GAL1  
P2RY12  
ST8SIA1  
AGXT2  
PINK1  
SKP2  
SLC3A2  
UBE2Z  
SLC6A4  
SLC6A8  
SFTPA1  
NME1-NME2  
SLC8A1  
SLC12A3  
SLC22A1  
SLPI  
SMARCA4  
SMN1  
SMN2  
SMPD2  
SMS  
SNAI1  
SNTB2  
SOD3  
SOS1  
SP1  
SPARC

SPI1  
SRC  
SRY  
TRIM21  
SSBP1  
SSRP1  
SST  
SSTR2  
ST14  
STAR  
STIM1  
AURKA  
SULT2A1  
ABCC8  
TAC1  
MAP3K7  
TAZ  
TBXA2R  
TBXAS1  
MIR575  
MIR612  
MIR647  
ZEB1  
TCF15  
TRBV20OR9-2  
TDO2  
TEK  
TFAM  
TFRC  
TGFB1I1  
TGFB2  
TGFB1  
THM  
THY1  
TLR1  
SERPING1  
TNFAIP6  
TNNT3  
TNNT2  
TP73  
TPH1  
TPI1  
TPM2

TPO  
TPT1  
HSP90B1  
TRAF1  
TRAF2  
TRL-TAG1-1  
TRPC1  
TRPC5  
TRPC6  
TSC1  
POTEF  
TWIST1  
SFTPA2  
TXNRD1  
TYROBP  
SUMO1  
UMOD  
UTRN  
VARS1  
VAV1  
VAV2  
VIP  
BEST1  
CA1  
MIR758  
ZNF148  
ZNF202  
PSS  
NPHS2  
LEPQTL1  
FZD5  
SCG2  
AUNIP  
METRN  
KCTD15  
FA2H  
SLC52A2  
HMBOX1  
TNFAIP8L2  
RHBDF2  
PPP1R3B  
STEAP4  
ARHGEF5

ADM2  
NAA25  
PNPLA3  
ADAM12  
SPX  
APOL6  
KMT2D  
AAAS  
HMGA2  
COLEC12  
CALR  
CALU  
SLC7A5  
PLA2G12A  
NRIP1  
GATD3A  
CANX  
CAPG  
KDM5D  
H4C9  
BRAP  
ARHGAP24  
MFRP  
H4C1  
H4C4  
H4C6  
H4C12  
H4C11  
H4C3  
H4C8  
H4C2  
H4C5  
H4C13  
H4C14  
JAM3  
TAF3  
CCDC8  
MINDY4  
NR0B2  
AKT1S1  
LCOR  
MAK16  
RETNLB

CREB3L3  
ORAI1  
PPM1D  
HSH2D  
PIK3R3  
HAT1  
CYP4F2  
ABCC11  
DCLK3  
DENR  
RUNX2  
PLA2G4C  
TP63  
DYNLL1  
VAMP8  
DGAT1  
TNFRSF25  
TNFSF13  
ADAM9  
TNFRSF14  
TNFRSF6B  
TNFRSF11A  
SUCLA2  
NRP1  
CCN5  
HCAR3  
ALKBH1  
VNN1  
SPHK1  
SGPL1  
KRIT1  
TIMELESS  
PHOX2B  
WNT3A  
TRPA1  
SELENBP1  
KALRN  
CH25H  
SAMD1  
ARTN  
PSTPIP2  
CLDN1  
DPP9

SLC16A3  
P2RX6  
ARHGEF1  
PDCD5  
HGS  
RSAD2  
TMSB10  
IL1RL1  
OSMR  
ARHGEF2  
WDR20  
GGTLC1  
MAGI1  
PDLIM7  
COPB2  
GPR55  
CD19  
MS4A1  
SLIT2  
CACNA2D4  
PIIG  
ARHGAP18  
COX5A  
CD27  
CLEC6A  
MUC16  
CD80  
FADS2  
CD86  
ABCG2  
GSTO1  
PCYT1B  
CHST3  
ATG5  
ADAMTS1  
NPEPPS  
PTGES  
CXCL14  
H6PD  
GOSR2  
NR1D1  
AKAP12  
TRAF4

PHF14  
KDM4A  
CD70  
ECE2  
CD74  
SEMA3E  
DOCK4  
CD81  
KMT2B  
ATG13  
MTSS1  
MAML1  
TRIM14  
ELMO1  
MFN2  
MAFB  
DLEC1  
HS3ST1  
MVP  
FGF19  
CDC42  
RCE1  
CDH1  
KCNE2  
SCO2  
GSTP1  
MRAS  
DUOX1  
HDL3  
BCAR1  
DUOX2  
AXL  
BMPR1B  
MAP1LC3B  
MIR638  
TLN1  
TYRO3  
MARCO  
PSMG1  
SLC5A7  
DUSP2  
VASH1  
CYP11B2



ADAR  
MIR6740  
HOXC-AS1  
TMX2-CTNND1  
ADCYAP1R1  
ZNF688  
CSE1L  
KLF6  
GSTO2  
ACHE  
ARSA  
HOXC6  
ACAA1  
GPT  
HSP90AB1  
CYP17A1  
SLC3A1  
HBHR  
THBS2  
UCP3  
ADH1B  
PLA2G5  
SENCR  
KCNQ1  
APOC4  
IL24  
SLC4A1  
OPRM1  
GDE1  
ZFAS1  
HOMER1  
HOMER2  
HOMER3  
CELSR1  
MTRNR2L8  
RRS1  
MIR7-2  
SAMHD1  
MIR1908  
FAM215A  
IMPA1  
TNXB  
XYLT1

XYLT2  
MIR130A  
GSTA4  
ITGA7  
NDUFS6  
SMARCAL1  
ERCC2  
ERCC3  
ERCC4  
ERCC5  
SOX9  
RAPGEF5  
G3BP1  
RAMP1  
SPEG  
SEPTIN9  
DCBLD2  
SENP1  
SMAD2  
MPV17  
NOTCH4  
NPHP1  
RASL11B  
CD151  
TRIB1  
ANKS1A  
WDR12  
HECTD4  
MRPS6  
ABCC9  
KCNJ8  
TGFB2  
FOXE3  
KCNJ5  
MAT2A  
MPI  
SERPINA5  
PCYT1A  
PRKG1  
TGFB3  
TGFB1  
MFAP5  
CERNA3

BCHE  
LGALS2  
MUSK  
ABCB1  
RAPSN  
SLC22A3  
XRCC1  
FLAD1  
PER2  
AMPD1  
IL16  
UGT1A1  
TCP1  
TMSB4X  
FSD1  
FSD1L  
KIF28P  
KIF2C  
COL4A2  
CPE  
ADRB1  
GRK2  
CYP4A11  
CELSR2  
C5AR2  
BTBD8  
HLA-DRB1  
MIR423  
AVP  
RNLS  
VEGFC  
PROM1  
ZPR1  
F2RL3  
CYP2R1  
TMEM170A  
ADH1C  
EGR3  
TBC1D9  
SIRT4  
GALNT2  
GDF10  
AMFR

GGT1  
GCLC  
GPX3  
AREG  
PEAR1  
LAMP2  
LTBP1  
MIRLET7C  
MIR31  
ASGR1  
MTR  
MVK  
ZFHX3  
NCAM1  
NHS  
ACR  
MIR361  
SERPINB2  
FCMTE1  
ISYNA1  
ARL15  
FCMTE2  
BTNL2  
STARD7  
MIR484  
SCN5A  
BHMT  
CXCL5  
GMCL1  
GMCL2  
SI  
AIDA  
SLC5A1  
GGTLC5P  
TNNT1  
GGTLC3  
GGT2  
GGTLC4P  
UCN  
CASQ2  
BUD13  
MGAM  
CDH2

MIR939  
MIR365B  
KLLN  
MIR711  
HOTTIP  
MIR4271  
MIR4513  
HIF1A-AS2  
EDIL3  
COX10-AS1  
IFNG-AS1  
PPIF  
LRPPRC  
EMSLR  
MPHOSPH6  
AKR1A1  
SEMA3A  
TAB1  
THRA1/BTR  
ANP32B  
MRPL28  
SLCO1B1  
ERLIN1  
EBP  
ARPP21  
NMU  
NPFFR2  
SUB1  
KCNQ1OT1  
BTN2A1  
PADI2  
PRRT2  
ATXN2L  
C1QTNF3  
CIRBP  
H3P9  
H3P40  
CKMT2  
LRRC3B  
CMTM5  
ACKR2  
ADORA1  
ADORA2A

CPA3  
ADORA2B  
CPS1  
CRH  
FUNDC1  
ADORA3  
CSN2  
ADRA1D  
PTPRVP  
CTLA4  
ADRA2A  
CTRB1  
ERFE  
CYP2C18  
SLC7A13  
SPAAR  
SLC35G1  
AP2A2  
C16orf82  
DEFA1  
DEFA3  
ASXL1  
DIAPH1  
EEF2  
EFNA5  
EIF5A  
ENDOG  
ERBB3  
ERCC1  
EXTL3  
F8  
FCGR1A  
FCGR1B  
JAZF1  
FEN1  
FGF4  
CD93  
ATF6  
FOXC1  
KDM1A  
MON2  
MCF2L2  
GPD1L

ABRAXAS2  
FLOT2  
ARC  
PHLPP1  
DICER1  
ZFPM2  
TPSD1  
FOLH1  
ARL2BP  
PPP1R15A  
IL17RA  
SPESP1  
HECTD1  
POC1A  
GALNT3  
SOSTDC1  
GAPDH  
SENP3  
GFAP  
DESI1  
GLI3  
GLUL  
GPLD1  
IFNL3  
LINC00841  
UTS2R  
METRNL  
TREML4  
XKR6  
SCAI  
GRK4  
GRIK4  
NXT1  
MYLIP  
GSTA1  
HBA2  
EHD3  
HLA-DQB1  
HLA-G  
HMGB2  
ACACB  
HSPA8  
HTR2A

IFNB1  
IFNGR2  
APOD  
IFRD1  
IGFBP4  
ACADS  
LCE1A  
CXCR1  
IL12B  
IL15RA  
AQP5  
INSIG1  
LINC01116  
KCNQ3  
ARG2  
KRT1  
KRT8  
SUMO4  
ACAT2  
LMAN1  
MIRLET7I  
MIR132  
MIR15B  
MIR197  
MIR208A  
MIR32  
MIR320A  
MIR34B  
MIR93  
ARRB2  
MB  
MET  
MDD1  
EIF2AK4  
MIR367  
MSX2  
NUDT1  
MYB  
MYBPC3  
NCL  
NGF  
NM  
NTRK2



NUCB2  
MIR381  
MIR424  
ATP4B  
OPA1  
OTC  
OXCT1  
P2RY11  
ASCC1  
CPA4  
CLEC1B  
CDK18  
PDE3B  
CES1P1  
RTEL1  
ADA2  
PF4V1  
SERPINE2  
PIGR  
PIK3C2A  
PKD1  
PKP2  
FXYD1  
PLN  
BCO1  
POR  
PIMREG  
DDIT4  
UGT1A6  
EGLN1  
PPIC  
CNNM2  
PPID  
TRPM7  
PPM1B  
MTARC2  
RMDN3  
NADSYN1  
QRSL1  
FBXW7  
MIR429  
YOD1  
CAMK2N1

PARL  
SRGN  
ITLN1  
PRKCE  
KDM3A  
PRKCH  
PRKY  
PPAN  
MAP3K7CL  
MEPE  
PRDM10  
PSMD4  
KMT5AP1  
AICDA  
MIR503  
NLN  
KIDINS220  
XPO5  
PTPRA  
RASGRF2  
RELB  
RLN1  
BRD2  
BACH2  
HPSE2  
RPA1  
RPN1  
RZR2  
S100A6  
SCN9A  
HEATR6  
CRLF2  
SELENOP  
NFKBIZ  
DCLRE1C  
NDST4  
C12orf43  
SLN  
SNRNP70  
SUV39H1  
TADA2A  
TBX5  
PPAN-P2RY11

MIR574  
TCN2  
TERC  
TERF1  
TFAP2B  
TFR2  
THPO  
THRA  
KLF10  
TIMP2  
TIMP4  
TNFAIP3  
TRAF5  
C3AR1  
TRPS1  
C5  
TYMS  
TYRP1  
VCP  
VDAC1  
VEGFB  
WNT3  
ZNF208  
ZNF217  
BSND  
ST8SIA4  
S100G  
CALCA  
GHS  
CALCR  
STN1  
ZNF606  
CALM1  
CCDC92  
CALM2  
CALM3  
SETD7  
ST6GALNAC5  
MIA  
USP9Y  
CRISPLD1  
ZNF484  
ESYT3

KCTD10  
FCAMR  
MAP1LC3A  
KIF2B  
TRIM63  
CNDP1  
SNHG7  
MMP23B  
DOCK7  
PIAS1  
MADD  
RUNX3  
GALNT4  
SERPINH1  
CCN4  
ARHGEF7  
AP1S2  
MBD2  
MCFD2  
MCU  
TBL1Y  
FCGR2C  
NLRP12  
INTS4  
ASIC3  
GLP2R  
TXNL1  
SLC22A6  
LONP1  
RAB9A  
SLC22A8  
FAM189A2  
OPN4  
GGPS1  
HAND2  
TBPL1  
GMFG  
CHD1L  
KLK4  
PRORP  
HDAC4  
KEAP1  
C1QA

MMACHC  
LPIN1  
LCT  
TMBIM1  
GLB1  
PLXND1  
NUDT6  
MAB21L2  
GHR  
GPBP1  
ERCC8  
TNFAIP8  
KIF20A  
ADRA1B  
TXNDC5  
PPP1R17  
TTC39B  
SOHLH1  
ANKRD1  
HSPA12A  
PLCB3  
P4HA3  
MIR125B1  
ITGB7  
PHLDA1  
THSD1  
CNMD  
DDHD1
